# Supplementary material for: CAMELS-FR dataset: A large-sample hydroclimatic dataset for France to explore hydrological diversity and support model benchmarking
Source: Copernicus journal article supplement (doi:10.5194/essd-2024-415), 2024-11-13
Supplement: Supplementary file [file essd-2024-415-AC2-supplement.pdf]

## CC1 answer

We thank Joseph Janssen for his feedback on the paper.

**In section 4, can you specify how many catchments failed each of your four catchment selection criteria (i.e., area mismatch). Thanks!**

As we envision this dataset to be updated regularly, we did not want to be too specific to a single version of the dataset regarding the exact number of catchments remaining for each selection criteria. However, we include in the paper the criteria that had the most impact on the station selection where we mention that the time series availability was responsible for removing approximately 70 % of all stations available in France (see Sect. 4.1). To appease your curiosity, we detail below how many catchments passed each of the four catchment selection criteria. When we made the data extraction, there were 4667 hydrometric stations.

| Compliance to criterion | Hydrometric time series availability | Artificial reservoirs influences | Consistency in catchment areas |
|-------------------------|--------------------------------------|----------------------------------|--------------------------------|
| True                    | 1313                                 | 3669                             | 4572                           |
| False                   | 3354                                 | 998                              | 95                             |

Following the order presented in the paper, the number of stations at each selection criterion step is:

1. Hydrometric time series availability: 1313
2. Artificial reservoirs influences: 1055
3. Consistency in catchment areas: 1031
4. Streamflow quality inspection: 654

About “Streamflow quality inspection”, we visually checked the time series, while also checking information provided by the producers, e.g.: quality flag on streamflow times series (available for each time step), metadata about the influence, and the comments about influence (if missing data “influence” metadata, and also about the quality of the hydrometric mesures).

Note that as the producers update in real time the data (streamflow time series, quality flags, metadata, etc.), there can be some discrepancies from one extraction to another.

We think that this complementary information answers Mr. Janssen’s questions. Since we want to keep the article content valid for subsequent version of the database, we would prefer not to include this information in the revised version of the manuscript.
