# Supplementary material for: CAMELS-FR dataset: A large-sample hydroclimatic dataset for France to explore hydrological diversity and support model benchmarking
Source: Copernicus journal article supplement (doi:10.5194/essd-2024-415), 2024-11-13
Supplement: Supplementary file [file essd-2024-415-AC3-supplement.pdf]

## RC2 answer

We thank Dr Larisa Tarasova for her feedback on the paper.

The submitted manuscript provides a description of catchment attributes and hydrometeorological time series for 654 French catchments. All the data described very clearly, manuscript is well-organized and well-written. The visualization tool is amazing! CAMELS-FR will be a very valuable addition for the community of large sample hydrology. I have just a few editorial suggestions.

### Editorial comments

**Line 45-48:** It would be helpful to specify here a possible nature of these outliers (apart from karstic catchments).

Beyond karstic catchments, we also have groundwater-dominated catchments, fed by the chalk aquifer of the Parisian Basin, e.g. codes H504063010 ("Le Cailly à Notre-Dame-de-Bondeville"), E645651001 ("La Nièvre à l'Étoile"), or E540031001 ("La Canche à Brimeux"), they all have very high baseflow indices.

This information will be added in the revised version.

**Figure 2:** This is not critical, but would look nicer if all maps would have the same style in terms of displaying administrative boundaries and areas outside France. Consider homogenizing the panels of this Figure.

Thank you for your suggestion, we will update the figure adding administrative boundaries on all maps.

**Line 162:** in some stations

**Line 169:** lack of artificial reservoirs

**Line 170:** sufficient streamflow quality

Thank you for correcting the sentences to be more readable, we will follow your recommendations.

**Table 1:** explain what SIM2 stands for

Thank you for pointing out. In Sect 5.1, line 219 we mention that SIM2 stands for SAFRAN-ISBA-MODCOU hydrometeorological model chain, which is maintained by Météo-France, and which is used to produce operationally the SAFRAN interpolated product

**Table 2:** Which attribute is meant here by "Other". I did not find a corresponding explanation in Section 6. Please clarify.

The variable that corresponds to the "Other" class is related to the site metadata variable "sit\_publication\_rights". In our dataset, all the stations have this variable filled with "Publication for the general public", and we think that on the public version of the Hydroportail website this variable will always have this value. There is another version of the Hydroportail website for the producers where they have some additional sites and stations that are not public. We decided to keep all the

metadata available in Hydroportail in the CAMELS-FR dataset and as in the future, there may be other metadata that may not be classified among the 9 main classes presented on Table 2, we decided to classify this specific variable under a more generic class name such as “Other”. We did not want to specify this variable to a “License” class to avoid confusion about the general license of our dataset.

**Figure 7:** Very nice!

Thank you very much.
